# Supplementary material for: Convex Optimization for Group Feature Selection in Networked Data
Source: Atypon-hosted journal article supplement (doi:10.1287/ijoc.2018.0868), 2019-07-18
Supplement: ijoc.2018.0868.sm1.pdf [file ijoc.2018.0868.sm1.pdf]

Authors are encouraged to submit new papers to INFORMS journals by means of a style file template, which includes the journal title. However, use of a template does not certify that the paper has been accepted for publication in the named journal. INFORMS journal templates are for the exclusive purpose of submitting to an INFORMS journal and should not be used to distribute the papers in print or online or to submit the papers to another publication.

## Online Supplement for Convex Optimization for Group Feature Selection of Networked Data

Daehan Won

Department of Systems Science & Industrial Engineering, Binghamton University, the State University of New York, NY,  
dhwon@binghamton.edu

Hasan Manzour

Department of Industrial & Systems Engineering, University of Washington, Seattle, WA, hmanzour@uw.edu

W. Art Chaovalitwongse

Institute for Advanced Data Analytics, Department of Industrial Engineering, University of Arkansas, Fayetteville, AR,  
artchao@uark.edu

---

### Appendix Analysis of Convergence

In this section, we analyze the convergence property of Algorithm 1. Assume the current iteration step is  $l$ . At the  $l$ -th iteration, a new constraint  $\mathbf{s}_l$  below can be found via the CGP derived by  $\boldsymbol{\alpha}^{l-1}$

$$h(\boldsymbol{\alpha}^{l-1}, \mathbf{s}_l) = \max_{\mathbf{s} \in \mathcal{E}(\mathcal{V})} h(\boldsymbol{\alpha}^{l-1}, \mathbf{s}). \quad (1)$$

As a result, the new constraint set  $F_l$  is given by  $F_l = F_{l-1} \cup \{\mathbf{s}_l\}$ .

Define  $ub^l = \min_{1 \leq k \leq l} h(\boldsymbol{\alpha}^{k-1}, \mathbf{s}_k)$  and  $(\boldsymbol{\eta}^l, \boldsymbol{\alpha}^l)$  as the intermediate solution pair to Problem (12), which is obtained by

$$\boldsymbol{\alpha}^l = \arg \min_{\boldsymbol{\alpha} \in A} \left( \max_{\mathbf{s}_t \in F_l} h(\boldsymbol{\alpha}, \mathbf{s}_t) \right), \quad (2)$$

$$\boldsymbol{\eta}^l = \max_{1 \leq k \leq l} h(\boldsymbol{\alpha}^l, \mathbf{s}_k) = \min_{\boldsymbol{\alpha} \in A} \left( \max_{1 \leq k \leq l} h(\boldsymbol{\alpha}, \mathbf{s}_k) \right). \quad (3)$$

For notational convenience, we introduce  $lb^l$  such that  $\eta^l = lb^l$ . We obtain

$$lb^l = \min_{\alpha \in A} \max_{1 \leq k \leq l} h(\alpha, \mathbf{s}_k), \quad (4)$$

$$ub^l = \min_{1 \leq k \leq l} h(\alpha^{k-1}, \mathbf{s}_k) = \min_{1 \leq k \leq l} \left( \max_{\mathbf{s} \in \mathcal{E}(\mathcal{V})} h(\alpha^k, \mathbf{s}) \right). \quad (5)$$

Based on the definitions of  $lb^l$  and  $ub^l$ , we present the following two lemmas to prove that Algorithm 1 converges to the optimal solution.

**LEMMA 1.** *Suppose  $(\eta^{opt}, \alpha^{opt})$  is an optimal solution pair of Problem (11). Inequality  $lb^l \leq \eta^{opt} \leq ub^l$  holds at the  $l$ -th iteration. As iteration step increases, the sequence  $\{lb^l\}$  is monotonically increasing and  $\{ub^l\}$  is monotonically decreasing.*

*Proof.* Firstly, we have the optimal solution  $\eta^{opt} = \min_{\alpha \in A} \max_{\mathbf{s} \in \mathcal{E}(\mathcal{V})} h(\alpha, \mathbf{s})$  from Problem (11). For any feasible  $\alpha$  in Problem (11), we have  $\max_{\mathbf{s} \in F_l} h(\alpha, \mathbf{s}) \leq \max_{\mathbf{s} \in \mathcal{E}(\mathcal{V})} h(\alpha, \mathbf{s})$  under  $F_l \subseteq \mathcal{E}(\mathcal{V})$ . With consideration of  $\alpha$ , we obtain:

$$\min_{\alpha \in A} \max_{\mathbf{s} \in F_l} h(\alpha, \mathbf{s}) \leq \min_{\alpha \in A} \max_{\mathbf{s} \in \mathcal{E}(\mathcal{V})} h(\alpha, \mathbf{s}).$$

By Eq. (4), we have  $lb^l \leq \eta^{opt}$ .

On the other hand, from Problem (1),  $\mathbf{s}_k = \arg \max_{\mathbf{s} \in \mathcal{E}(\mathcal{V})} h(\alpha^{k-1}, \mathbf{s})$  for  $k = 1, \dots, l$ . Thus,  $\{(\alpha^{k-1}, h(\alpha^{k-1}, \mathbf{s}_k))\}_{k=1}^l$  is a set of feasible solutions to Problem (11). Since  $(\alpha^{opt}, \eta^{opt})$  is the optimal solution to Problem (11), any feasible solution  $h(\alpha^{k-1}, \mathbf{s}_k)$  satisfies  $\eta^{opt} \leq h(\alpha^{k-1}, \mathbf{s}_k)$ , for  $k = 1, \dots, l$ . This follows from Eq. (5) and finally we have  $\eta^{opt} \leq ub^l$ .

Localized set  $F_l$  is monotonically expanding with increasing iteration step  $l$ . Therefore, the sequence  $\{lb^l\} = \{\eta^l\}$  is also monotonically increasing. Along the same line, the sequence  $\{ub_l\}$  is monotonically decreasing. ■

According to the Lemma 1, the convergence can be traced by the gap between  $lb^l$  and  $ub^l$ . For example, if this gap is less than a predetermined tolerance, the Algorithm 1 is terminated.

**LEMMA 2.** *Assume that our algorithm converges at the  $l$ -th step. The intermediate solution  $(\eta^{l-1}, \alpha^{l-1})$  is the global optimal solution to Problem (11).*

*Proof.* Once the algorithm is terminated at the  $l$ -th iteration, there is no more update from the  $(l-1)$ -th step to  $l$ -th step. Thus,  $F_l = F_{l-1}$  and  $\alpha^l = \alpha^{l-1}$ . A new constraint  $\mathbf{s}_l$  at the  $l$ -th iteration is given by  $\mathbf{s}_l = \arg \max_{\mathbf{s} \in \mathcal{E}(\mathcal{V})} h(\alpha^l)$ . From Problem (1), we have

$h(\boldsymbol{\alpha}^{l-1}, \mathbf{s}_l) = \max_{\mathbf{s} \in \mathcal{E}(\mathcal{V})} h(\boldsymbol{\alpha}^{l-1}, \mathbf{s})$  and it is equivalent to  $h(\boldsymbol{\alpha}^{l-1}, \mathbf{s}_l) = \max_{\mathbf{s} \in F_l} h(\boldsymbol{\alpha}^{l-1}, \mathbf{s})$  as the new constraint  $\mathbf{s}_l \in F_l = F_{l-1}$ . Following from Eqs. (4) and (5), we obtain

$$\begin{aligned} h(\boldsymbol{\alpha}^{l-1}, \mathbf{s}_l) &= \max_{\mathbf{s} \in \mathcal{E}(\mathcal{V})} h(\boldsymbol{\alpha}^{l-1}, \mathbf{s}) = \max_{\mathbf{s} \in F_{l-1}} h(\boldsymbol{\alpha}^{l-1}, \mathbf{s}) = \eta^{l-1} \\ ub^{l-1} &= \min_{1 \leq k \leq l} h(\boldsymbol{\alpha}^{k-1}, \mathbf{s}_k) \leq \eta^{l-1} \end{aligned} \tag{6}$$

Since we already proved that  $lb^l \leq \eta^{opt} \leq ub^l$  in Lemma 1, we obtain  $\eta^l = lb^l$ . Consequently, we conclude that  $lb^{l-1} = ub^{l-1} = \eta^{l-1} = \eta^{opt}$  and  $(\eta^{l-1}, \boldsymbol{\alpha}^{l-1})$  is the optimal solution to Problem (11). ■
